# Supplementary material for: Effects of LiBOB on salt solubility and BiF3 electrode electrochemical properties in fluoride shuttle batteries
Source: Royal Society of Chemistry journal article supplement (doi:10.1039/c8ta10396h), 2019-01-01
Supplement: c8ta10396h1.pdf [file c8ta10396h1.pdf]

This ESI for *J. Mater. Chem. A*, 2019, 7, 8559-8567, originally published on 21st March 2019, was updated on 20th May 2019, to fix an error in the legend of Fig. S6(b) ('orthorhombic' has been changed to 'cubic').

## Effects of LiBOB on Salt Solubility and BiF<sub>3</sub> Electrode Electrochemical Properties in Fluoride Shuttle Batteries

Asuman Celik Kucuk<sup>a\*</sup>, Taketoshi Minato<sup>a</sup>, Toshiro Yamanaka<sup>a</sup>, Takeshi Abe<sup>b\*</sup>

*Office of Society-Academia Collaboration for Innovation, Kyoto University, Katsura, Nishikyo, Kyoto 615-8530, Japan.  
Graduate School of Global Environmental Studies, Kyoto University, Katsura, Nishikyo, Kyoto 615-8530, Japan.*

### Supporting information

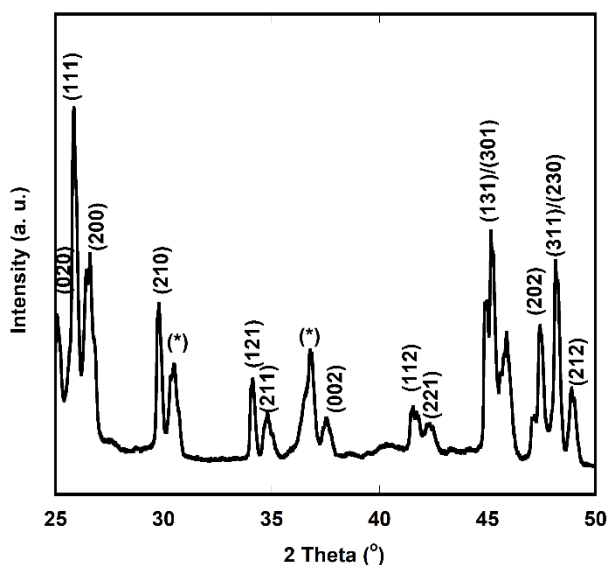

Fig. S1 X-ray diffraction patterns of BiF<sub>3</sub>/C in the pristine state; \* represents the peak related to the pocket.

Table S1 Reference solutions prepared using tetraglyme (G4) and lithium bis(oxalato)borate (LiBOB)

| Code                      | LiBOB (M)      |
|---------------------------|----------------|
| LiBOB <sub>0.06</sub> /G4 | 0.06 (1 wt%)   |
| LiBOB <sub>0.25</sub> /G4 | 0.25 (4.4 wt%) |
| LiBOB <sub>0.5</sub> /G4  | 0.5 (9 wt%)    |

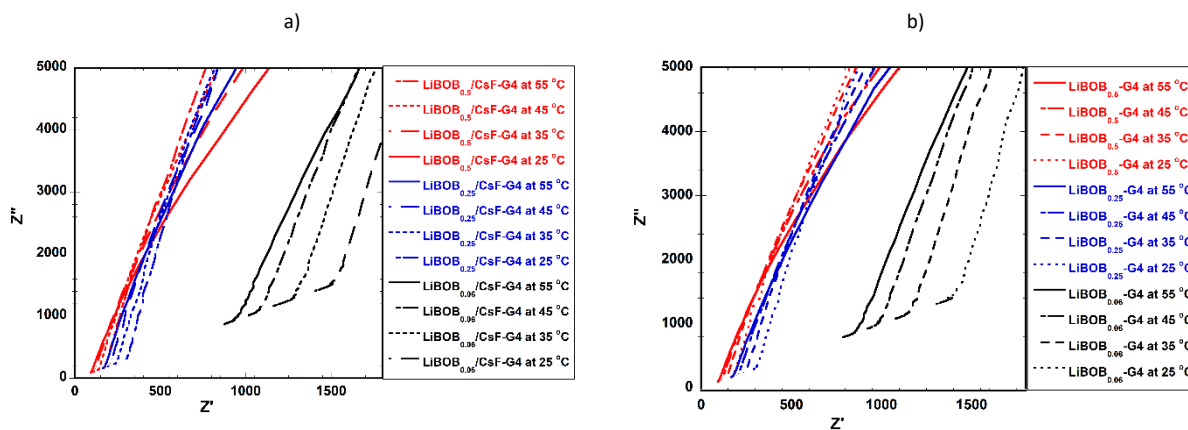

Fig. S2 Temperature and concentration dependence of the ionic conductivity for the (a)  $\text{LiBOB}_n/\text{CsF}/\text{G4}$  and (b)  $\text{LiBOB}_n/\text{G4}$  electrolyte solutions (LiBOB: lithium bis(oxalato)borate; G4: tetraglyme; n: LiBOB molar concentration).

Table S2 Comparison between the temperature dependence of the conductivity of the  $\text{LiBOB}_n/\text{CsF}/\text{G4}$  and  $\text{LiBOB}_n/\text{G4}$  solutions (LiBOB: lithium bis(oxalato)borate; G4: tetraglyme, Ea; Activation Energy)

|                                            | 25 °C                 | 35 °C                 | 45 °C                 | 55 °C                 | Ea (kJ/mol) |
|--------------------------------------------|-----------------------|-----------------------|-----------------------|-----------------------|-------------|
| $\text{LiBOB}_{0.06}/\text{G4}$            | $3.98 \times 10^{-4}$ | $4.65 \times 10^{-4}$ | $5.08 \times 10^{-4}$ | $5.87 \times 10^{-4}$ | 15.6        |
| $\text{LiBOB}_{0.06}/\text{CsF}/\text{G4}$ | $3.64 \times 10^{-4}$ | $4.21 \times 10^{-4}$ | $4.57 \times 10^{-4}$ | $5.37 \times 10^{-4}$ | 16.18       |
| $\text{LiBOB}_{0.25}/\text{G4}$            | $1.28 \times 10^{-3}$ | $1.57 \times 10^{-3}$ | $1.88 \times 10^{-3}$ | $2.19 \times 10^{-3}$ | 14.32       |
| $\text{LiBOB}_{0.25}/\text{CsF}/\text{G4}$ | $1.31 \times 10^{-3}$ | $1.63 \times 10^{-3}$ | $1.95 \times 10^{-3}$ | $2.28 \times 10^{-3}$ | 14.7        |
| $\text{LiBOB}_{0.5}/\text{G4}$             | $2.24 \times 10^{-3}$ | $2.81 \times 10^{-3}$ | $3.43 \times 10^{-3}$ | $4.00 \times 10^{-3}$ | 10.21       |
| $\text{LiBOB}_{0.5}/\text{CsF}/\text{G4}$  | $2.27 \times 10^{-3}$ | $2.86 \times 10^{-3}$ | $3.49 \times 10^{-3}$ | $4.17 \times 10^{-3}$ | 10.15       |

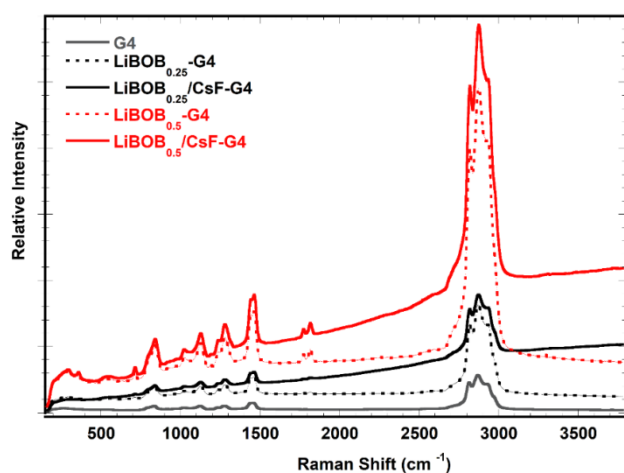

Fig. S3 Raman spectra of  $\text{LiBOB}_{0.25}/\text{CsF}/\text{G4}$ ,  $\text{LiBOB}_{0.5}/\text{CsF}/\text{G4}$ ,  $\text{LiBOB}_{0.25}/\text{G4}$ ,  $\text{LiBOB}_{0.5}/\text{G4}$ , and pure G4 in the of 200–3800  $\text{cm}^{-1}$  region (LiBOB: lithium bis(oxalato)borate; G4: tetraglyme).

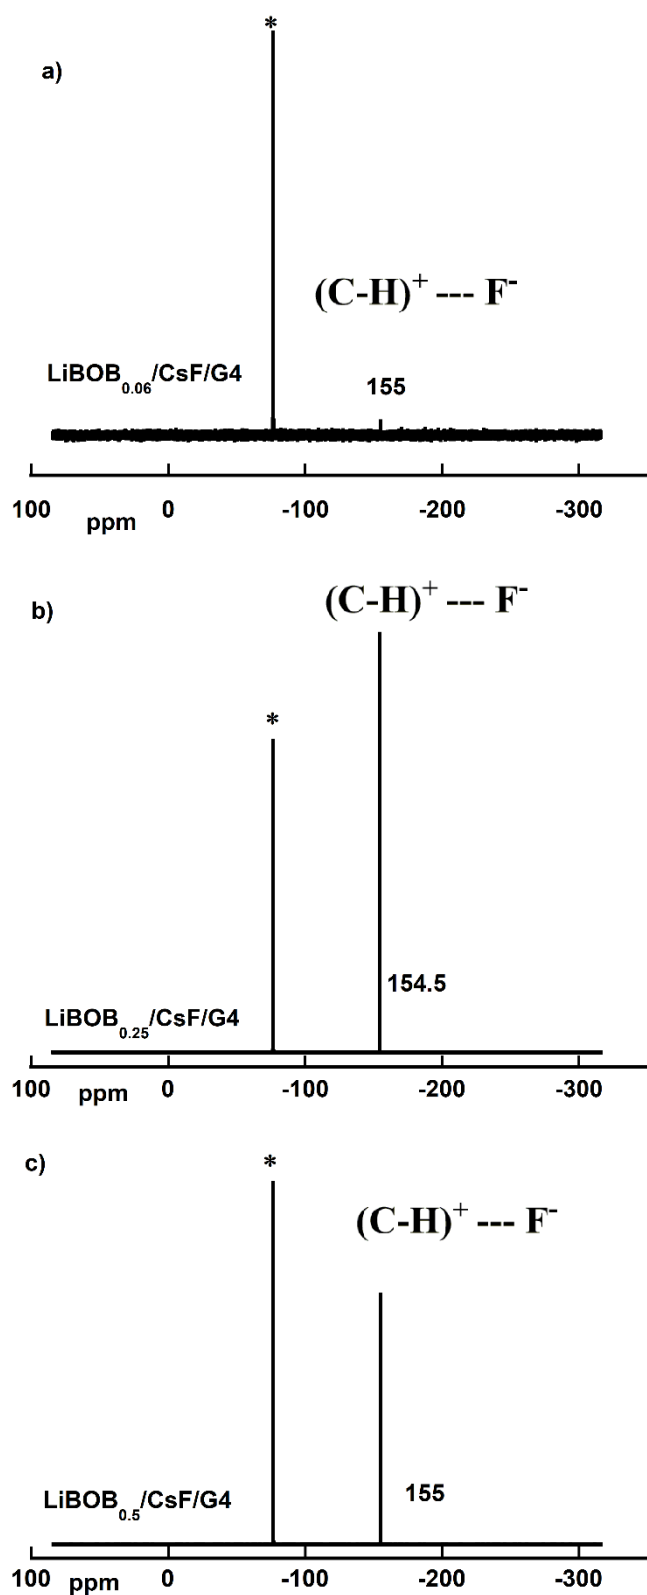

Fig. S4  $^{19}\text{F}$  NMR spectra of (a)  $\text{LiBOB}_{0.06}/\text{CsF}/\text{G4}$ , (b)  $\text{LiBOB}_{0.25}/\text{CsF}/\text{G4}$ , and (c)  $\text{LiBOB}_{0.5}/\text{CsF}/\text{G4}$  electrolytes. Chemical shift related to the reference of trifluoroacetic anhydride (TFAA) at  $-76.5$  ppm is shown with an asterisk (\*).

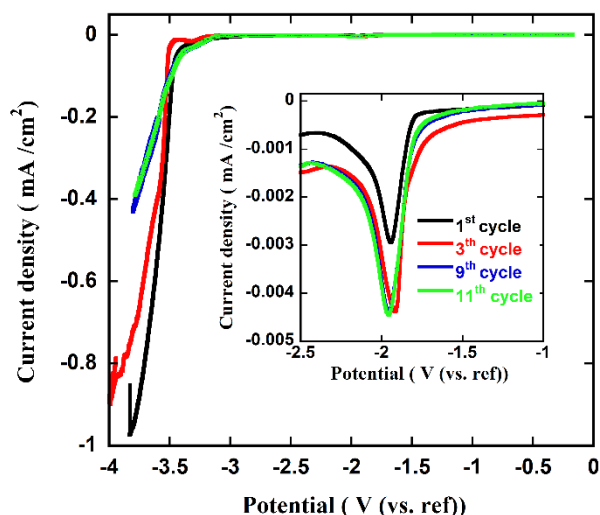

**Fig. S5** Linear sweep voltammograms of the glassy carbon electrode in LiBOB<sub>0.25</sub>/CsF/G4 (LiBOB: lithium bis(oxalato)borate; G4: tetraglyme) in the potential range from  $-4.0$  to  $0.0$  V (vs reference electrode) at a scan rate of  $1 \text{ mV s}^{-1}$ .

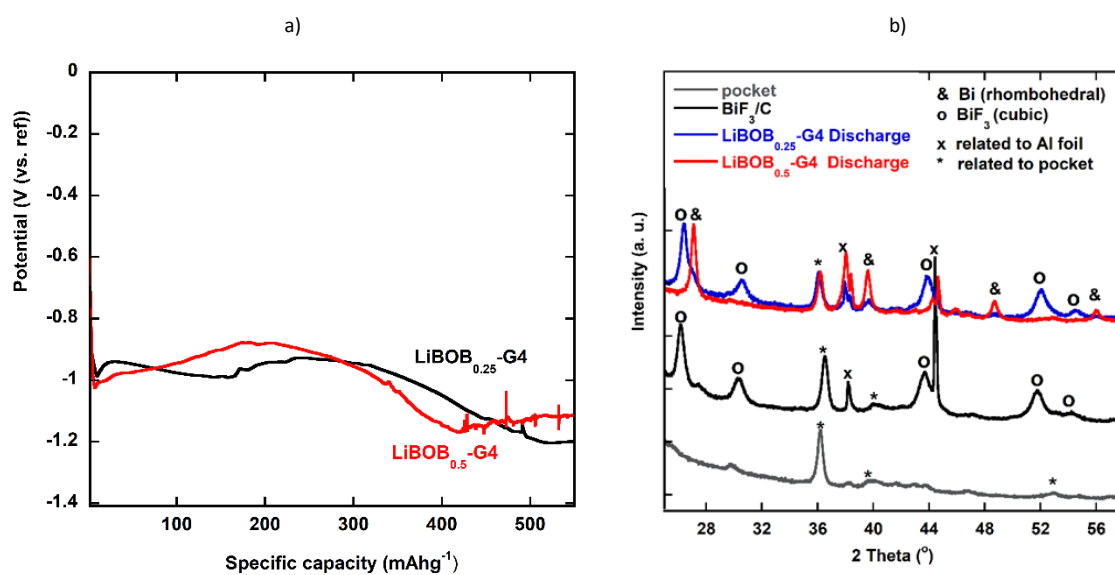

**Fig. S6** (a) Initial first discharge–charge curves of the BiF<sub>3</sub>/C nanocomposite electrodes, cycled at room temperature and  $1/40$  C rate in LiBOB<sub>0.25</sub>/G4 and LiBOB<sub>0.5</sub>/G4, containing  $0.25 \text{ M}$  and  $0.5 \text{ M}$  LiBOB (discharging cutoff voltage:  $-1.6 \text{ V}$ ), respectively. (b) X-ray diffraction patterns of BiF<sub>3</sub>/C in the pristine, fully discharged states for LiBOB<sub>0.25</sub>/G4 and LiBOB<sub>0.5</sub>/G4. (LiBOB: lithium bis(oxalato)borate; G4: tetraglyme.)

**Table S3** Relation between capacity and cycling number for LiBOB<sub>0.25</sub>/CsF/G4 (LiBOB: lithium bis(oxalato)borate; G4: tetraglyme) at  $1/40$  C rate

| Cycle Number                              | 1 <sup>st</sup> | 2 <sup>nd</sup> | 3 <sup>rd</sup> | 4 <sup>th</sup> | 5 <sup>th</sup> | 6 <sup>th</sup> |
|-------------------------------------------|-----------------|-----------------|-----------------|-----------------|-----------------|-----------------|
| Discharge capacity (mAh g <sup>-1</sup> ) | 340             | 116             | 93              | 80              | 72              | 70              |
| Charge capacity (mAh g <sup>-1</sup> )    | 117             | 86              | 75              | 70              | 65              | 70              |
